# Supplementary material
Source: PubMed Central journal article supplement (PMC11090501)

keyframe extraction process, we utilize a histopathology image classifier to identify histopathology content within the extracted keyframes. See A.3 for more details. To identify narrative-style videos, we randomly select a  $\min(\text{num\_of\_histo\_scene\_frames}, 20)$  keyframes from a video and utilize a pre-trained CLIP<sup>8</sup> (ViT-B-32) model to embed and compute a cosine similarity on the next three keyframes. If all three have similarity scores  $\geq$  a threshold of 0.9, we count the video as a narrative streak.

**Text extraction using ASR and text denoising.** Another challenge involves automatic speech recognition (ASR), as YouTube captions are often inadequate for medical vocabulary. To address this issue, we employed the Large-V2 open-source Whisper model [49] for speech-to-text conversion. However, general-purpose ASR models like Whisper can misinterpret medical terms, particularly when the speaker’s voice is choppy or accented. There are no straightforward trivial solutions due to: **1)** the absence of openly available medical ASR models or data for fine-tuning in the medical domain; **2)** the inadequacy of medical named entity recognition models in detecting transcription errors, because these models are typically trained on correctly spelled words; **3)** the ineffectiveness of methods like semantically searching over a medical glossary, such as UMLS, which only prove effective when the erroneous text has significant similarity to the correct terms; and **4)** the inability of simpler methods like finding the longest common substring, which might work in finding a match in the glossary/ontology for replacement, but cannot identify the wrong words/phrases in the first place. To rectify ASR errors, we employed UMLS (a knowledge database) and a LLM (GPT-3.5). This, however, introduces a new challenge of identifying incorrectly transcribed words and determining which words were mistakenly "corrected" and correctly formatted by the LLM after error correction and resolving unintended parsing errors [1]. See Figure 9 for LLM prompt examples for ASR correction and medical and ROI text extraction from the corrected ASR text. Refer to Table 11 for error examples of ASR correction using the LLM.

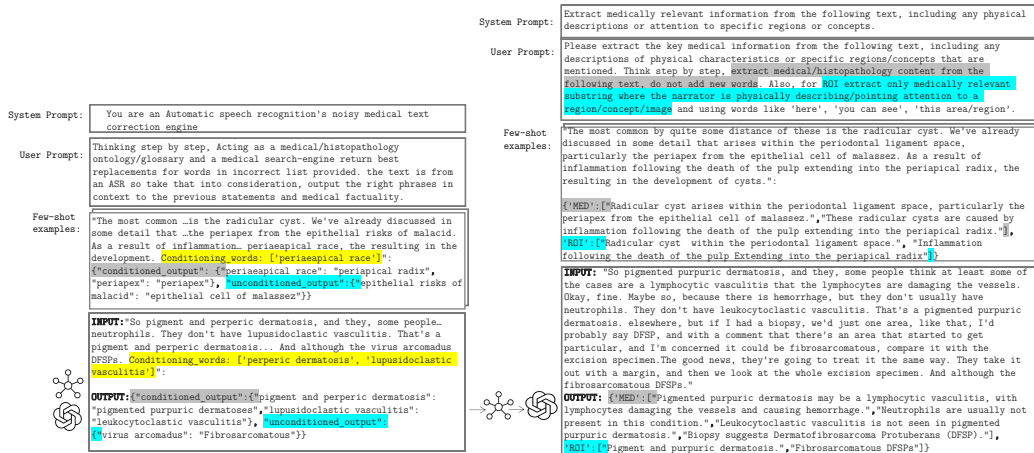

Figure 9: Prompting the LLM by providing few-shot examples to perform the following tasks: (Left) correcting noisy ASR text within its context. We highlight the probable list of misspelled keywords in yellow and their corrections by the LLM in gray. Additional missed errors/misspelled entries identified by the LLM are highlighted in blue. (Right) extracting medical (MED) and ROI text from a given text. We highlight the definition of medical and ROI text in blue and gray respectively.

**Image frame extraction and denoising.** The image processing aspect of this task adds to its complexity, as it requires static frame detection, quality control for frames, and histology magnification classification. Each model utilized in these steps introduces its own biases and errors. We extract time-intervals (*chunks*) from each video from which we extract representative image(s). For each of the extracted *chunks* ( $t_n, t_{n+1}$ ), the static chunk detection algorithm 1 is used to extract sub-time-intervals with static frames within the chunk. If found, we save the median (in pixel space to prevent blurry outputs) of the stable frames, else (i.e no stable duration of frames) we leverage the structural similarity index (SSIM) method on histopathology key-frames to find the most dissimilar

<sup>8</sup><https://huggingface.co/sentence-transformers/clip-ViT-B-32>

Table 11: Salvagable and Non-salvagable cases for ASR correction using an LLM.

| Error due to            | Raw output                                                                                                                                                                                                                                                                                                                                                                                        | Salvagable<br>(because LLM can rephrase and/or extract contextually similar correction)                     | Non-salvagable<br>(because the error losses all possible medical context and can lead to wrong entries)                           |
|-------------------------|---------------------------------------------------------------------------------------------------------------------------------------------------------------------------------------------------------------------------------------------------------------------------------------------------------------------------------------------------------------------------------------------------|-------------------------------------------------------------------------------------------------------------|-----------------------------------------------------------------------------------------------------------------------------------|
| Unfinetuned ASR         | ...look like the cranialomas I would expect in HP. They actually look more sarcoidal to me. The reason I say that is they, there's a kind of <b>positive</b> of inflammatory cells associated with them. They're really tight and well-formed. They're very easy to see a low power. And so HP is in the <b>differential hypersensium nitose</b> , but I would be more worried about sarcoidosis. | <b>differential hypersensium nitose</b> : hypersensitivity pneumonitis,<br><b>cranialomas</b> : granulomas  | <b>positive</b> : paucity                                                                                                         |
| LLM                     | <b>high-larbidia-stinal lymphadenocathy</b><br><b>lymphin-giatic pattern distribution</b>                                                                                                                                                                                                                                                                                                         | returns <b>hilar lymphadenopathy</b> instead of a more appropriate <b>hilar mediastinal lymphadenopathy</b> | returns <b>lymphatic pattern distribution</b> instead of a more appropriate <b>lymphangitic pattern distribution</b>              |
| Incomplete UMLS checker | ... <b>picnotic</b>                                                                                                                                                                                                                                                                                                                                                                               | -                                                                                                           | LLM correctly returns <b>pyknotic</b> however, UMLS(2020) does not have the word <i>pyknotic</i> if fails to pass the UMLS check. |

histopathology image to make up the representative images for the chunk, essentially de-duplicating the frames. Figure 13 demonstrates this process.

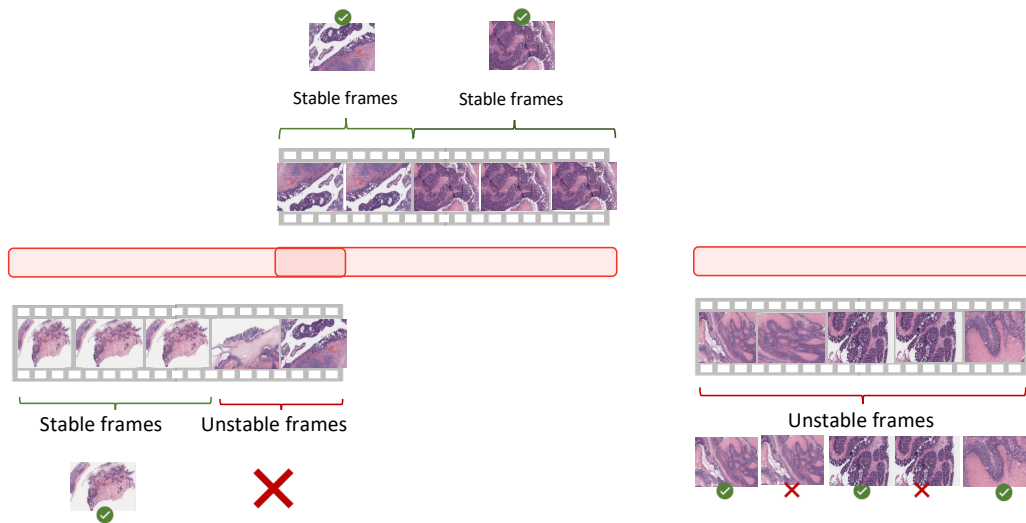

Figure 13: Representative Frame Identification. If a Stable frame is found by Algorithm 1 within the candidate regions, we use it as the representative frame. If not, we use the most dissimilar frames among unstable frames.

---

**Algorithm 1** Static Video Chunk Detection Algorithm
 

---

```

1: procedure DETECTSTATICFRAMES(video, starttime, endtime)
2:   video = video[starttime:endtime]
3:   fixedFrames  $\leftarrow$   $\emptyset$ 
4:   SSIMValidatedFrames  $\leftarrow$   $\emptyset$ 
5:   prevFrame  $\leftarrow$  first frame in video
6:   for frame  $\in$  rest of frames in video do
7:     absDiff  $\leftarrow$  absolute difference between frame and prevFrame
8:     absDiffThresh  $\leftarrow$  apply adaptive thresholding using a Gaussian filter to absDiff
9:     meanVal  $\leftarrow$  mean value of absDiffThresh
10:    if meanVal < 10 then
11:      fixedFrames  $\leftarrow$  fixedFrames  $\cup$  frame
12:    else
13:      if length of fixedFrames  $\geq$  minimum duration then
14:        subclip  $\leftarrow$  extract sub-clip of frames with constant background from fixedFrames
15:        for patch  $\in$  randomly selected patches in each frame of subclip do
16:          SSIMVal  $\leftarrow$  calculate SSIM of patch
17:          if SSIMVal > threshold then
18:            SSIMValidatedFrames  $\leftarrow$  SSIMValidatedFrames  $\cup$  frame
19:          end if
20:        end for
21:      end if
22:      fixedFrames  $\leftarrow$   $\emptyset$ 
23:    end if
24:    prevFrame  $\leftarrow$  frame
25:  end for
26:  staticTimestamps  $\leftarrow$  extract start and end times from SSIMValidatedFrames
27:  return staticTimestamps
28: end procedure

```

---

**Aligning both modalities.** The alignment of the images with their corresponding text requires the implementation of unique algorithms. These algorithms are designed to reduce duplicate content and ensure accurate mappings between image and text. See Figures 7 and 8 and Table 9 for a demonstration of image-text alignment process. See Figure 15 for sample images and their corresponding medical and ROI texts and the sub-pathology classification provided by the LLM.

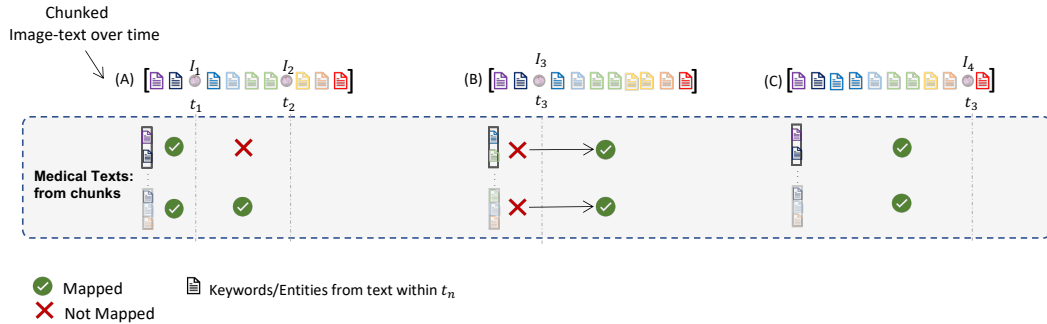

Figure 7: **Overview of use of timing and keywords for Alignment** Images within a video chunk, i.e. {A, B, C},  $I_n$  at  $t_n$  are aligned with medical texts extracted within the same chunk. The *raw\_keywords* within each example chunk is colour coded to illustrate matches with *keywords* extracted from the medical texts and only matching keywords allow for the pairing of texts containing said *keywords* to image frames with frame-times around *raw\_keywords* times.

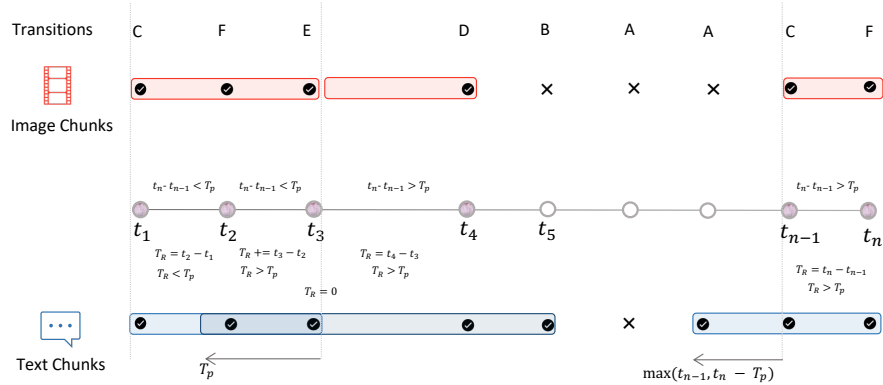

Figure 8: **Video Chunking algorithm illustrate.** With each transition tag explained in Table 9, we leverage predicted histopathology frames at times  $t_1, \dots, t_n$  to segment videos into chunks. Chunks at are minimum are  $T_P$  in duration, this value is estimated based on the word-per-second of the video with a minimum of 20 words being captured per chunk. Images within a chunk, unlike texts, are not overlapping with other chunks. Text overlap is done to provide needed context for LLM text correction and extraction.

Table 9: **All 6 (six) transition states for chunking narrative style videos.**  $p(H)_{t_n}$  is the binary histo image classifier prediction at the current frame’s time  $t_n$  and  $p(H)_{t_{n-1}}$  is the prediction at next frame’s time  $t_{n-1}$ , where  $T_R$  is the cumulative running time and  $T_P$  is the estimated minimum chunk time for the video, determined by the words per second of the video. Text and image chunks are implemented as an ordered list of time intervals and image indexes.

| $P(H)@t_n$ | $P(H)@t_{n-1}$ | $t_n - t_{n-1} > T_P$ | $T_r > T_P$ | Text chunk                                                          | Image chunk                                                                    | Tag |
|------------|----------------|-----------------------|-------------|---------------------------------------------------------------------|--------------------------------------------------------------------------------|-----|
| 0          | 0              | -                     | -           | -                                                                   | -                                                                              | A   |
| 0          | 1              | -                     | -           | $end = t_n$ ; append( $s, e$ ); reset                               | append index to chunk state, if state is empty append prior index; reset state | B   |
| 1          | 0              | -                     | -           | $start = \max(t_{n-1}, t_n - T_P)$                                  | append index to chunk state                                                    | C   |
| 1          | 1              | 1                     | -           | $end = t_n$ ; append( $s, e$ ); reset state;<br>$start = t_n - T_P$ | append index to chunk state; reset state                                       | D   |
|            |                | 0                     | 1           | $end = t_n$ ; append( $s, e$ ); reset state;<br>$start = t_n - T_P$ | append index to chunk state; reset state                                       | E   |
|            |                |                       | 0           | -                                                                   | append index to chunk state                                                    | F   |

## A.2 Other data sources

### A.2.1 PubMed Open Access Articles

We searched the PubMed open-access from 2010 – 2022 with keywords (pathology, histopathology, whole-slide image, H&E, and 148 keywords from a histopathology glossary<sup>9</sup>). We utilized Entrez<sup>10</sup> to retrieved the top 10,000 most relevant articles for each keyword. This query yielded 109,518 unique articles with PMCID. We extracted 162,307 images and their corresponding captions. Using our histopathology classifier and cropping multi-plane figures as described in A.4, we extracted 62,458 histopathology image and caption pairs with an average caption length of 54.02 tokens. Figure 16 demonstrates the pipeline of collecting data from PubMed.

### A.2.2 Histopathology Image Retrieval from LAION

The Large-scale Artificial Intelligence Open Network (LAION-5B) [54] curated over 5 billion pairs of images and text from across the Internet, including a substantial volume of histopathology-related

<sup>9</sup><https://lab-ally.com/histopathology-resources/histopathology-glossary>

<sup>10</sup><http://www.ncbi.nlm.nih.gov/Entrez>

| Image                                                                               | Medical TEXT                                                                                                                                                                                                                                                                                                         | ROI Text                                                                                                                              | Sub-pathology Classification                           |
|-------------------------------------------------------------------------------------|----------------------------------------------------------------------------------------------------------------------------------------------------------------------------------------------------------------------------------------------------------------------------------------------------------------------|---------------------------------------------------------------------------------------------------------------------------------------|--------------------------------------------------------|
| 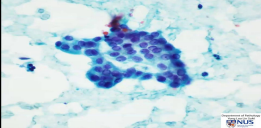   | ['There are clusters of cells with micro-follicular formations.', 'Nuclear pseudo-inclusions, oval nuclei, nuclear grooves, and small nucleoli are present in some cells.']                                                                                                                                          | ['clusters of cells', 'micro-follicular formations', 'nuclear pseudo-inclusions', 'oval nuclei', 'nuclear grooves', 'small nucleoli'] | ['Endocrine', 'Cytopathology', 'Head and Neck']        |
|    | ['Cluster of macrophages and T cells is characteristic of acute rheumatic fever.', 'Aschoff body is a characteristic feature of acute rheumatic fever.', 'Macrophages with elongated chromatin are called Anitschkow cells and are commonly seen in Aschoff bodies.', 'Pancarditis with Aschoff bodies is present.'] | ['Cluster of macrophages and T cells', 'Aschoff body', 'Macrophages with elongated chromatin', 'Anitschkow cells', 'Pancarditis']     | ['Cardiac', 'Hematopathology', 'Endocrine']            |
|    | ['An 80-year-old man has a scar-like plaque on the scalp that has been called malignant on a biopsy.', 'The tissue affected by the plaque extends from the epidermis to the galea aponeurotica, near the periosteum of the skull.', 'The skin, dermis, and subcutis are all affected by the process.']               | ['scar-like plaque on the scalp', 'malignant on a biopsy', 'skin, dermis, and subcutis affected by the process']                      | ['Dermatopathology', 'Soft tissue', 'Hematopathology'] |
|    | ['Inflammatory cells surrounding cartilage can indicate acute chondritis, with neutrophils being the principal cell type.', 'Chronic chondritis may be diagnosed if lymphocytes are the predominant inflammatory cell type.']                                                                                        | ['cartilage', 'inflammatory cells']                                                                                                   | ['Hematopathology', 'Bone', 'Dermatopathology']        |
|    | ['Large histiocytes with abundant cytoplasm identified as Rosai-Dorfman histiocytes.', 'S100 stain showed perivascular cuffing.', 'Initial diagnosis of inflammatory pseudotumor of the orbit.', 'Rosai-Dorfman disease may burn out and leave behind fibrotic pockets.']                                            | ['Large histiocytes', 'perivascular cuffing', 'fibrotic pockets']                                                                     | ['Dermatopathology', 'Soft tissue', 'Hematopathology'] |
|   | ['Epidermal acanthosis and papillomatosis resembling a wart or seborrheic keratosis.', 'Presence of large sebaceous glands that drain directly through their duct out to the skin surface, which is abnormal.', 'Presence of a demodex mite.']                                                                       | ['Epidermal acanthosis and papillomatosis', 'large sebaceous glands', 'demodex mite']                                                 | ['Dermatopathology', 'Soft tissue', 'Hematopathology'] |
|  | ['Histological description of glandular tissue with little atypia but located in a place where it does not belong can be a helpful criteria to discern the presence of malignancy.', 'Glands located on the periphery and infiltrating into adventitia and peripancreatic tissue may be malignant.']                 | ['glandular tissue', 'pancreas,']                                                                                                     | ['Gastrointestinal', 'Pancreatic', 'Hematopathology']  |

Figure 15: A collection of sample images from our dataset, accompanied by corresponding medical text, ROI text, and the top three sub-pathology classifications derived from the ASR text using the LLM.

data. We tapped into this resource by retrieving the 3000 most similar LAION samples for each of the 1,000 pairs of images and text sampled from PubMed and QUILT, using a CLIP model pre-trained on the LAION data. The retrieval process utilized both image and text embeddings, with cosine similarity serving as the distance metric. Subsequently, we eliminated the duplicate images and removed all non-English pairs from the remaining pairs using LangDetect<sup>11</sup>. Consequently, the process yielded  $\approx 23,240$  image and text pairs.

### A.2.3 Twitter Data from OpenPath

We utilized a list of tweets curated by Huang et al. [24] which totaled up to 55,000 unique tweets and 133,526 unique image-text pairs. This exhibits a one-to-many relationship that leans towards the image side, differentiating our work from the OpenPath approach, where we had one image matching with multiple captions (as in the case of MS-COCO captions). In order to maintain comparability with OpenPath, we followed their text pre-processing pipeline given in [24].

<sup>11</sup><https://github.com/fedelopez77/langdetect>

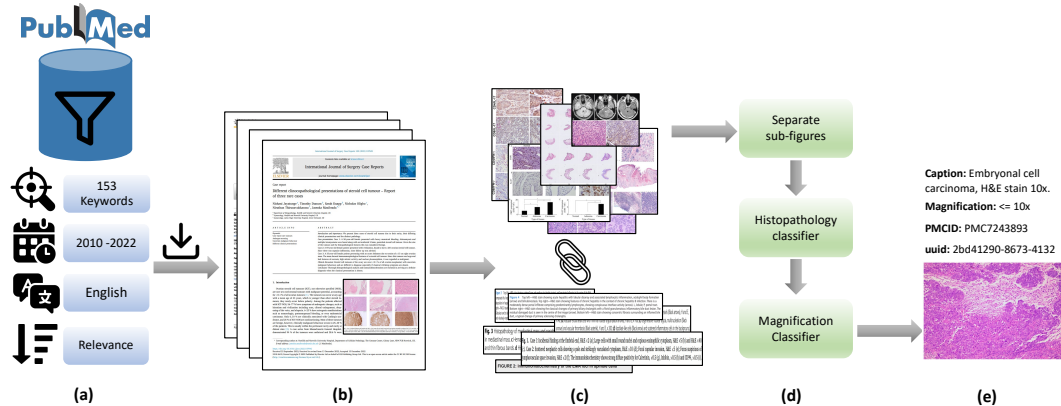

Figure 16: (a) Search PubMed open access database, filter based on keywords, date, language and sort by relevance. (b) Download paper and media for each search result. (c) Extract and pair figures and captions. (d) Separate multi-plane figures, find histopathology images and their magnification. (e) Final result.

### A.3 Histopathology and Magnification classifier

We use an ensemble of three histopathology image classifiers. To ensure robustness, our ensemble approach consists of two small Conv-NeXt models [39] and one linear classifier fine-tuned with DINO features [11]. This combination is necessary due to the homogenous appearance of histopathology images and the risk of false positives from similar pinkish-purple images. One Conv-NeXt model is trained in detecting non-H&E Immunohistochemistry (IHC) stained tissue images, while the other models are trained to handle all IHC stains and tissue types. The training data includes eight subgroups of the TCGA WSI dataset and a mix of general-domain images, PowerPoint (slide) images, and scientific figure datasets. See Table 7 for details of these datasets.

For the magnification classifier, we finetune a pretrained ConvNeXt-Tiny model [39], with standard preset hyperparameters for a few epochs and select the best performing model on the validation set. To generate a training set for the magnification model, TCGA subsets were segmented into patches using a method similar to [67]. These patches were generated at various magnifications, which were then categorized into three labels: 0: {1.25x, 2.5x, 5x, 10x}, 1: {20x}, 2: {40x}. The TCGA subsets were chosen to ensure a diverse representation of tissue morphologies and cancer types, thereby ensuring robust and comprehensive model training. The model was also trained on cytopathology microscopy images and various IHC stains beyond H&E to enhance the model’s generalizability across different conditions. Only the ACROBAT and TCGA datasubsets are preprocessed to divide the WSIs into patches at various scales.

### A.4 Support Models, Ontology Databases and Algorithms

This section describes the support models, ontology databases and handcrafted algorithms utilized within our pipeline for both searching and parsing our data.

**Ontology databases.** We employ various ontologies, both specific to histopathology and general ones. Among them are OCHV [2], FMA [44], BCGO<sup>12</sup>, NCIT [19], MPATH [53], HPATH [65], and CMPO [30]. These ontologies serve a dual purpose. First, we used histopathology-specific ontologies (HPATH, MPATH, BCGO, and CMPO) to provide words/phrases to condition the LLM, enabling it to identify incorrect words. Second, all ontologies, in conjunction with UMLS, are used to obtain terms or phrases for validating the output of the LLM.

**Sub-pathology types.** The list of all 18 sub-pathology types used to prompt LLM on the text classification task are: *Bone, Cardiac, Cyto, Dermato, Endocrine, Gastrointestinal, Genitourinary, Gynecologic, Head and Neck, Hemato, Neuro, Ophthalmic, Pediatric, Pulmonary, Renal, Soft*

<sup>12</sup><https://bioportal.bioontology.org/ontologies/BCGO>

Table 7: Datasets used to train the histopathology image classifier. [ $\mu\text{m}$  per pixel - MPP]

| Data Source                     | Subset         | #WSI | #pathces | Train-Test  | Magnification   | Image-size  |
|---------------------------------|----------------|------|----------|-------------|-----------------|-------------|
| TCGA (H&E Stain)                | GBM            | 19   |          |             |                 |             |
|                                 | LUSC           | 20   |          |             | 89,022 - 40x    |             |
|                                 | LIHC           | 20   |          |             |                 |             |
|                                 | SARC           | 23   | 169,431  | 84715-16943 | 57,671 - 20x    | 384 x 384   |
|                                 | KIRC           | 16   |          |             | 16,660 - 10x    |             |
|                                 | KICH           | 4    |          |             | 4,748 - 5x      |             |
|                                 | BRCA           | 17   |          |             | 1,465 - 2.5x    |             |
| ACROBAT Weitz et al. [64]       | SKCM           | 19   |          |             | 466 - 1.25x     |             |
|                                 | H&E KI67       | 99   | 50589    | 28105-22484 | (10x, 5x, 2.5x) | 384 x 384   |
|                                 | ER , PGR, HER2 | -    |          |             |                 |             |
| BCI Liu et al. [37]             | -              | -    | 4,870    |             | 20x (0.46 MPP)  | 1024 x 1024 |
| CESD Liu et al. [36]            | -              | -    | 686      |             | 100x/400x       | 2048 x 1536 |
| Smear Hussain et al. [25]       | -              | -    | 963      |             | 400x            | 2048 x 1536 |
| Celeb Liu et al. [38]           | -              | -    | 202,599  | 8,103-1,944 | -               | -           |
| Places Zhou et al. [72]         | -              | -    | 36,550   | 2,109-1,372 | -               | -           |
| A12D Kembhavi et al. [33]       | -              | -    | 4,903    | 0.7-0.3%    | -               | -           |
| DocFig Jobin et al. [28]        | -              | -    | 33,004   | 0.8-0.2%    | -               | -           |
| SciFig-pilot Karishma [31]      | -              | -    | 1,671    | 0.8-0.2%    | -               | -           |
| SlideImages Morris et al. [42]  | -              | -    | 8,217    | 0.8-0.2%    | -               | -           |
| TextVQA Singh et al. [57]       | -              | -    | 28,472   | 0.8-0.2%    | -               | -           |
| SlideShare-1M Araujo et al. [3] | -              | -    | 49,801   | 0.8-0.2%    | -               | -           |

*tissue, and Breast Histopathology.* Figure 12 provides the LLM prompt to retrieve the top three sub-pathology classification based on a given text.

System Prompt: You are a histopathology text classifier

User Prompt: Imagine you are a text classifier. Classify the given text into one of the following surgical pathology types namely: Bone, Cardiac, Cytopathology, Dermatopathology, Endocrine, Gastrointestinal, Genitourinary, Gynecologic, Head and Neck, Hematopathology, Neuropathology, Ophthalmic, Pediatric, Pulmonary, Renal, Soft tissue, Breast pathology. Output only the top 3 pathology types in an ordered python list

Few-shot examples: "Radicular cyst arises within the periodontal ligament space, particularly the periapex from the epithelial cell of malassez. These radicular cysts are caused by inflammation following the death of the pulp extending into the periapical radix. Radicular cysts caused by inflammation are always associated with a non vital tooth."  
 ["'Soft tissue', 'Dermatopathology', 'Hematopathology'"]

**INPUT:**  
 "There is a lesion with slight thickening of the muscularis mucosa and submucosa. There is a subtle change in the lamina propria that doesn't look quite like normal stromal cells. Description of slight thickening of the muscularis mucosa and submucosa with subtle changes in the lamina propria. Highlighted field shows the changes more dramatically. Abnormal cells in the lamina propria that appear pink and spindly."  
**OUTPUT:** ["'Gastrointestinal', 'Soft tissue', 'Hematopathology'"]

Figure 12: Prompting LLM with few-shot examples to extract the top three sub-pathology classification of a given text.

**Pre-processing multi-plane figures.** Many figures in academic papers are multi-plane, which means a number of sub-figures (Charts, graphs, histopathology and non-histopathology sub-figures) are placed next to each other to make a larger figure. We extracted individual images from multi-plane



figures to create multiple instance bags. To locate boundaries and white gaps between sub-figures, we utilized Sobel filters. Binary thresholding was then used to find the contours surrounding the sub-figures. We employ image size and image ratio thresholds to remove undesirable sub-figures and our histopathology classifier to maintain just histopathology sub-figures. We supply the histological sub-figures individually for this type of figure by appending "\_[0-9]+" to the end of the multi-plane figure id. If a figure is divided into more than 5 sub-figures, we preserve the original image to ensure that the resolution of these sub-figures remains reasonable. Figure 11 shows an overview of this pre-processing step in different scenarios of successful and unsuccessful crops.

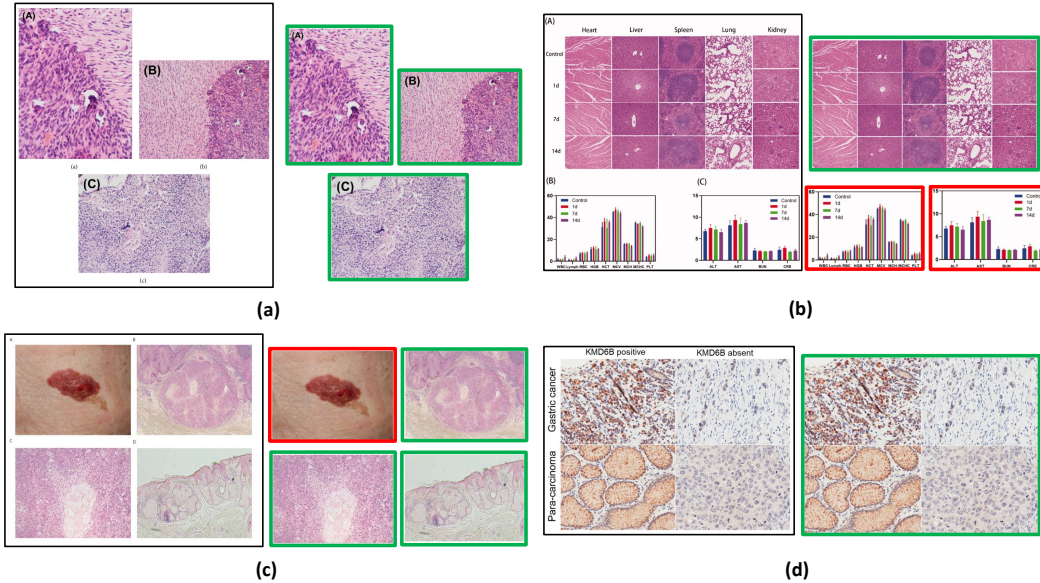

Figure 11: (a), (b), and (c) successfully cropped sub-figures where histopathology images (green box) are kept and non-histopathology (red box) images are removed. (b) histopathology crops are kept as not separated because the individual crops don't meet the size threshold so the original figure is kept. (d) Unsuccessful crop due to minimal gap between sub-figures. Original image is stored.

## A.5 Privacy preserving steps

In order to ensure privacy while handling the dataset, several steps were taken to protect sensitive information. These steps include:

- **Reduction of Signal to Noise using a LLM:** To protect the privacy of the dataset, a LLM was utilized to reduce the signal-to-noise ratio. By applying the LLM, irrelevant or sensitive information was masked or removed.
- **Exclusion of Videos Not Fully in Narrative Style:** Videos that did not adhere to a fully narrative style were intentionally left out of the dataset. This step was taken to minimize the risk of including any potentially private or sensitive content that could compromise individuals' privacy.
- **Release of Video IDs and Reconstruction Code:** Instead of directly releasing the complete dataset, only video IDs from YouTube were made public. Additionally, the code is provided to enable researchers to recreate the dataset.
- **Collection from Diverse Channels:** Data collection was performed from a wide range of sources, including both large and small channels. This approach aimed to decrease the risk of overfitting to specific channel types, thereby mitigating privacy concerns associated with potential biases linked to particular channels.



[56] contains 182 prostate histology WSIs with 10,340 patches (512 x 512px) and both annotations of global Gleason scores and patch-level Gleason grades. Images are labeled as Non cancerous, Grade 3, Grade 4, and Grade 5. **DatabioX** [8] consists of 922 Invasive Ductal Carcinoma cases of breast cancer. This data set has been collected from pathological biopsy samples of 150 patients which are labeled as Grade I, II and III. Each pathological sample in has four levels of magnification: 4x, 10x, 20x and 40x. **BACH** [4] consists of 400 WSIs of breast tissue which are labeled as normal, benign, in-situ and invasive carcinoma. **Osteo** [5] is a set of 1,144 patches (1024 x 1024px) taken from 40 WSIs representing the heterogeneity of osteosarcoma. Images are labeled as Viable tumor (VT), Non-tumor (NT) and Necrotic tumor (NEC). **RenalCell** [10] contains 27,849 images of clear-cell renal cell carcinoma H&E-stained (300 x 300px) annotated into five tissue texture types. **SkinCancer** [35] consists of 36,890 patches (395 x 395px) from WSIs skin biopsies from patients with Basal cell carcinoma (BCC), squamous cell carcinoma (SqCC), naevi and melanoma. Images were annotated for 16 categories: chondral tissue, dermis, elastosis, epidermis, hair follicle, skeletal muscle, necrosis, nerves, sebaceous glands, subcutis, eccrine glands, vessels, BCC, SqCC, naevi and melanoma. **MHIST** [63] contains 3,152 patches (224 x 224px) from 328 Formalin Fixed Paraffin-Embedded WSIs of colorectal polyps. These images are labeled as hyperplastic polyps (HPs) or sessile serrated adenomas (SSAs). **LC25000** [9] which we divide into **LC25000 (Lung)** with 15,000 and **LC25000 (Colon)** with 10,000 color images (768x768px). The lung subset is labeled as lung adenocarcinomas, lung squamous cell carcinomas, and benign lung tissues and the colon subset is labeled as colon adenocarcinomas and benign colonic tissues. Table 15 summarizes these datasets.

## C.2 QUILTNET Implementation

All model implementations in this study are built upon the open source repository OpenCLIP [27], which enables large-scale training with contrastive image-text supervision. The experiments were conducted using PyTorch and utilized up to 4 NVIDIA A40 GPUs. The hyperparameters for finetuning and training from scratch are provided in Table 12. During the training process, gradient checkpointing and automatic mixed precision (AMP) techniques were employed, with a datatype of `bfloat16`.

All models were trained with image size of 224, except for the finetuned ViT-B-32 models, where the images were first resized to 512 before randomly cropping them to the desired size of 224. In the case of ViT-B-32 finetuning, the data was kept stretched, meaning it maintained a one-to-one mapping between the image and text. However, for all other models, the data was unstretched. This means that for those models, sampling from medical texts occurred with a probability of  $p = \text{sample prob}$ , or sampling from ROI texts. Within the medical or ROI texts, sampling was done uniformly. For all finetuned GPT/77 models we use the OpenAI CLIP [48] pretrained network as initialization and for ViT-32 maintain the use of QuickGeLU<sup>13</sup>. We perform hyperparameter tuning for all linear probing results, exploring different values for learning rate, epochs, and weight decay. This process helped optimize the performance of the models during the linear probing stage.

---

<sup>13</sup><https://github.com/openai/CLIP/blob/main/clip/model.py>

Table 15: Downstream tasks and datasets. Note that SkinTumor dataset is a subset of SkinCancer. [ $\mu\text{m}$  per pixel - MPP]

|                                                                       | Task                                                                                               | Sub-Pathology       | Dataset              | Classes | Magnification      | Size (Train/Val/Test)        | Image-size                  |
|-----------------------------------------------------------------------|----------------------------------------------------------------------------------------------------|---------------------|----------------------|---------|--------------------|------------------------------|-----------------------------|
| Classification                                                        | Lymph-node metastasis detection                                                                    | Breast              | PatchCamelyon [60]   | 2       | 1 MPP              | (0.75/0.125/0.125) * 327,680 | 96 x 96                     |
|                                                                       | Tissue Phenotyping                                                                                 | Colorectal          | NCT-CRC-HE-100K [32] | 8       | 0.5 MPP            | 89,434/ - /6333              | 224 x 224                   |
|                                                                       | Gleason scoring                                                                                    | Prostate            | SICAPv2 [56]         | 4       | 1 MPP              | - / - /10,340                | 512 x 512                   |
|                                                                       | Bloom Richardson grading                                                                           | Breast              | Databiox [8]         | 3       | [2,1,0.5,0.25] MPP | - / - /922                   | (2100 x 1574), (1276 x 956) |
|                                                                       | Tissue classification (normal, benign, in-situ and invasive carcinoma)                             | Breast              | BACH [4]             | 4       | 0.5 MPP            | - / - / 400                  | 2048 x 1536                 |
|                                                                       | Osteosarcoma classification (non-tumor, necrotic tumor, and viable tumor)                          | Bone                | Osteo [5]            | 3       | 1 MPP              | - / - / 1,144                | 1024 x 1024                 |
|                                                                       | clear-cell renal cell carcinoma tissue phenotyping (renal cancer, normal, stromal, other textures) | Renal               | RenalCell [10]       | 5       | [0.5, 0.25] MPP    | - / - / 27,849               | 300 x 300                   |
|                                                                       | Classification of skin neoplasms and various anatomical compartments                               | Skin                | SkinCancer [35]      | 16      | .5 MPP             | 28039/-/8851 <sup>imb</sup>  | 395 x 395                   |
|                                                                       | Colorectal Polyp Classification                                                                    | Colorectal          | MHIST [63]           | 2       | 1 MPP              | - / - / 3,152                | 224 x 224                   |
|                                                                       | Lung adenocarcinoma classification (normal, adenocarcinoma and SCC)                                | Lung                | LC25000 (LUNG) [9]   | 3       | - MPP              | - / - / 15,000               | 768 x 768                   |
| Colon adenocarcinoma classification (normal and colon adenocarcinoma) | Colon                                                                                              | LC25000 (Colon) [9] | 2                    | - MPP   | - / - / 10,000     | 768 x 768                    |                             |
| Retrieval                                                             | histopathology image-text retrieval                                                                | -                   | Quilt-1M             | 1.02M*  | -                  | 13,562                       | -                           |
|                                                                       | histopathology image-text retrieval                                                                | -                   | ARCH [20]            | -       | -                  | 7500                         | -                           |

Table 12: Training hyperparameters for QUILTNET

| Hyperparameter         | Finetuning                           | Training                     |
|------------------------|--------------------------------------|------------------------------|
| batch size (per gpu)   | 256/1024                             | 1024                         |
| peak learning rate     | 1e-5                                 | 5.0e-4                       |
| learning rate schedule | constant                             | cosine decay                 |
| epochs                 | 15                                   | 40                           |
| warmup (in steps)      | 200                                  | 2000                         |
| random seed            | 0                                    | 0                            |
| image mean             | (0.48145466, 0.4578275, 0.40821073)  | same                         |
| image std              | (0.26862954, 0.26130258, 0.27577711) | same                         |
| augmentation           | Resize; RandomCrop (0.8, 1.0)        | RandomResizedCrop (0.8, 1.0) |
| optimizer momentum     | $\beta_1, \beta_2 = 0.9, 0.98$       | same                         |
| weight decay           | 0.1                                  | 0.2                          |
| eps                    | 1.0e-6                               | same                         |
| optimizer              | AdamW [40]                           | same                         |
| sample prob            | 0.85                                 | same                         |

## D Exploration of trained model representations

Table 14: Zero-shot image classification. accuracy (%). \* denotes models trained from scratch. SkinTumor is the Neoplastic Subset of SkinCancer. Also note that PMB refers to PubmedBert, a BERT model of 256 context length pre-trained on PMC-15M. We swapped our model’s text encoder from GPT2 to PubmedBert to assess performance differences

| Dataset        | ViT-B/32 |              |              |           | ViT-B/16     |              |              |              |
|----------------|----------|--------------|--------------|-----------|--------------|--------------|--------------|--------------|
|                | CLIP     | PLIP         | QUILTNET     |           | CLIP         | BiomedCLIP   | QUILTNET     |              |
|                | GPT/77   | GPT/77       | GPT/77       | (GPT/77)* | GPT/77       | PMB/256      | GPT/77       | PMB/256      |
| SkinCancer     | 5.40     | 36.65        | <b>45.38</b> | 8.93      | 5.40         | 24.75        | 23.41        | <b>28.93</b> |
| SkinTumor      | 10.35    | 56.36        | <b>58.29</b> | 36.26     | 13.85        | 37.0         | <b>51.47</b> | 51.20        |
| NCT-CRC        | 26.4     | 54.02        | <b>59.56</b> | 17.35     | 20.09        | 51.71        | 28.68        | <b>59.20</b> |
| PatchCamelyon  | 61.88    | 58.61        | <b>64.6</b>  | 49.92     | 50.45        | 53.25        | <b>67.91</b> | 53.52        |
| MHIST          | 52.92    | 57.52        | <b>62.54</b> | 44.52     | 52.3         | 40.23        | 44.32        | <b>52.71</b> |
| LC25000(LUNG)  | 61.36    | 78.77        | <b>80.16</b> | 67.71     | 50.29        | 72.44        | 50.71        | <b>81.87</b> |
| LC25000(COLON) | 62.5     | 77.79        | <b>93.28</b> | 72.08     | 78.56        | <b>90.57</b> | 62.26        | 87.1         |
| SICAPv2        | 39.40    | <b>44.53</b> | 39.49        | 25.07     | 27.38        | <b>45.81</b> | 25.54        | 45.1         |
| BACH           | 26.0     | <b>43.0</b>  | 41.25        | 33.75     | 27.25        | 54.75        | 40.75        | <b>62.0</b>  |
| Databiox       | 37.53    | 39.48        | <b>42.52</b> | 32.32     | <b>33.51</b> | 31.24        | 33.19        | 29.93        |
| Osteo          | 19.49    | 54.02        | <b>64.16</b> | 27.88     | 16.08        | 50.79        | 38.37        | <b>59.79</b> |
| RenalCell      | 20.3     | 50.7         | <b>52.57</b> | 16.35     | 28.80        | 47.08        | 28.32        | <b>50.72</b> |

Table 16: Classes for each dataset on zero-shot image classification. Note that we used the same prompt templates for each dataset. The templates used are: ["a histopathology slide showing {c}", "histopathology image of {c}", "pathology tissue showing {c}", "presence of {c} tissue on image"]

| Dataset       | Classes                                                                                                                                                                                                                                                             |
|---------------|---------------------------------------------------------------------------------------------------------------------------------------------------------------------------------------------------------------------------------------------------------------------|
| SkinCancer    | 'Necrosis', 'Skeletal muscle', 'Eccrine sweat glands', 'Vessels', 'Elastosis', 'Chondral tissue', 'Hair follicle', 'Epidermis', 'Nerves', 'Subcutis', 'Dermis', 'Sebaceous glands', 'Squamous-cell carcinoma', 'Melanoma in-situ', 'Basal-cell carcinoma', 'Naevus' |
| PatchCamelyon | 'Lymph node', 'Lymph node containing metastatic tumor tissue'                                                                                                                                                                                                       |
| NCK-CRC       | 'Adipose', 'Debris', 'Lymphocytes', 'Mucus', 'Smooth muscle', 'Normal colon mucosa', 'Cancer-associated stroma', 'Colorectal adenocarcinoma epithelium'                                                                                                             |
| MHIST         | 'Hyperplastic polyp', 'Sessile serrated adenoma'                                                                                                                                                                                                                    |
| LC25000Lung   | 'Lung adenocarcinoma', 'Benign lung', 'Lung squamous cell carcinoma'                                                                                                                                                                                                |
| LC25000Colon  | 'Colon adenocarcinoma', 'Benign colonic tissue'                                                                                                                                                                                                                     |
| BACH          | 'Breast non-malignant benign tissue', 'Breast malignant in-situ carcinoma', 'Breast malignant invasive carcinoma', 'Breast normal breast tissue'                                                                                                                    |
| SICAPv2       | 'Benign glands', 'Atrophic dense glands', 'Cribriform ill-formed fused papillary patterns', 'Isolated nest cells without lumen rosetting patterns'                                                                                                                  |
| Databiox      | 'Well differentiated bloom richardson grade one', 'Moderately differentiated bloom richardson grade two', 'Poorly differentiated grade three'                                                                                                                       |
| RenalCell     | 'Red blood cells', 'Renal cancer', 'Normal tissue', 'Torn adipose necrotic tissue', 'Muscle fibrous stroma blood vessels'                                                                                                                                           |
| Osteo         | 'Normal non-tumor', 'Necrotic', 'Tumor'                                                                                                                                                                                                                             |
| SkinTumor     | 'Squamous-cell carcinoma', 'Melanoma in-situ', 'Basal-cell carcinoma', 'Naevus'                                                                                                                                                                                     |

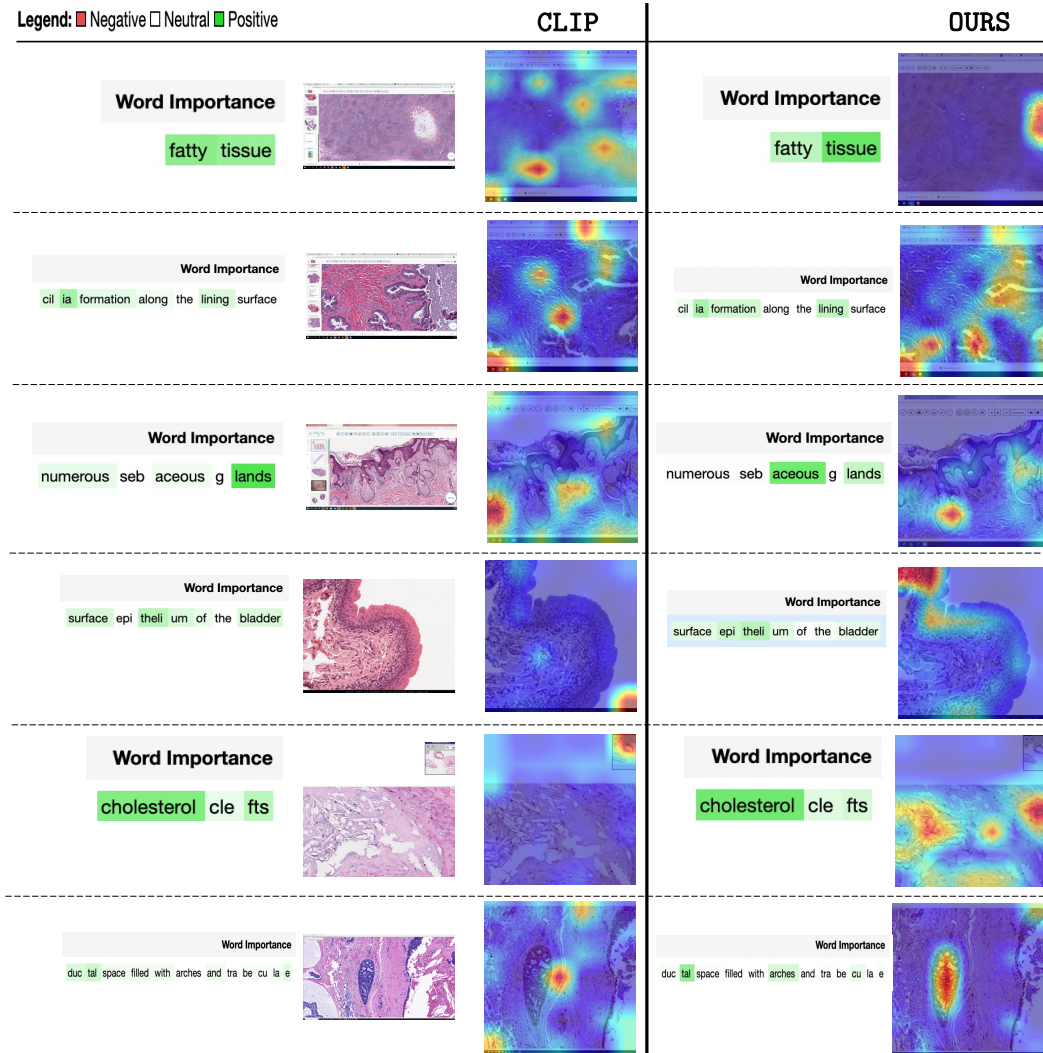

Figure 17: Comparison of the attention maps generated by QUILTNET and CLIP. The corresponding words are highlighted based on their importance. Attention masks were generated using GradCAM [55].

Table 17: UMAP visualization of image embeddings generated by QUILTNET from the different datasets listed in Table 15.

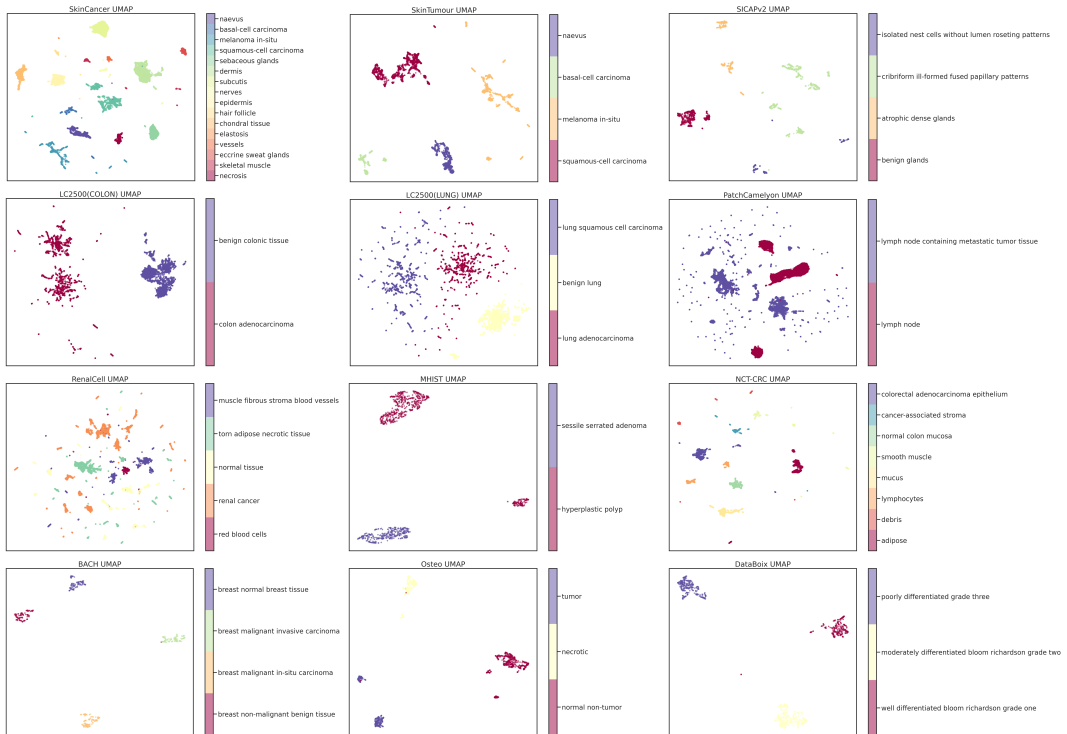

Supplement: NIHMS1938476-supplement-1.pdf [file NIHMS1938476-supplement-1.pdf]
